# Supplementary material
Source: PubMed Central journal article supplement (PMC4646607)
Supplement: NIHMS733997-supplement-Supplementary_Tables_1-2_and_Figures_1-3.pdf [file NIHMS733997-supplement-Supplementary_Tables_1-2_and_Figures_1-3.pdf]

Supplementary Content: Safety and Efficacy of Buparlisib (BKM120) in Patients With PI3K Pathway-Activated Non-Small Cell Lung Cancer (NSCLC): Results From the Phase II BASALT-1 Study

**SUPPLEMENTARY TABLE 1.** Summary of PI3K Pathway Alterations at Pre-Screening Stage

| PI3K Pathway Status                         | Squamous<br>(n = 668) | Non-Squamous<br>(n = 574) | Total<br>(N = 1242) <sup>a</sup> |
|---------------------------------------------|-----------------------|---------------------------|----------------------------------|
| <b>PI3K pathway activation<sup>b</sup></b>  | 103 (15.4)            | 65 (11.3)                 | 168 (13.5)                       |
| <b>PIK3CA mutation status, n (%)</b>        |                       |                           |                                  |
| Patients with confirmed status <sup>c</sup> | 388                   | 349                       | 737                              |
| PIK3CA mutation                             | 26 (6.7)              | 22 (6.3)                  | 48 (6.5)                         |
| PIK3CA wild-type                            | 362 (93.3)            | 327 (93.7)                | 689 (93.5)                       |
| Unknown                                     | 69                    | 95                        | 164                              |
| Missing                                     | 211                   | 130                       | 341                              |
| PIK3CA mutation only <sup>d</sup>           | 21 (5.4)              | 15 (4.3)                  | 36 (4.9)                         |
|                                             |                       |                           |                                  |
| <b>PTEN mutation status, n (%)</b>          |                       |                           |                                  |
| Patients with confirmed status <sup>c</sup> | 394                   | 342                       | 736                              |
| PTEN mutation                               | 25 (6.3)              | 36 (10.5)                 | 61 (8.3)                         |
| PTEN wild-type                              | 369 (93.7)            | 306 (89.5)                | 675 (91.7)                       |
| Unknown                                     | 61                    | 90                        | 151                              |
| Missing                                     | 213                   | 142                       | 355                              |
| PTEN mutation only <sup>d</sup>             | 18 (4.6)              | 29 (8.5)                  | 47 (6.4)                         |
|                                             |                       |                           |                                  |
| <b>PTEN expression, n (%)</b>               |                       |                           |                                  |
| Patients with confirmed status <sup>c</sup> | 444                   | 358                       | 802                              |
| PTEN negative (<10% IHC)                    | 64 (14.4)             | 16 (4.5)                  | 80 (10.0)                        |
| PTEN positive                               | 380 (85.6)            | 342 (95.5)                | 722 (90.0)                       |
| Unknown                                     | 17                    | 32                        | 49                               |
| Missing                                     | 207                   | 184                       | 395                              |
| PTEN negative only <sup>d</sup>             | 53 (11.9)             | 12 (3.4)                  | 65 (8.1)                         |

<sup>a</sup>Four patients were recorded with 'unknown' histology.

<sup>b</sup>PI3K activation defined as PIK3CA mutation, PTEN mutation, or PTEN negative (<10% protein expression by IHC).

<sup>c</sup>Patients with confirmed alteration status were used to calculate percentages.

<sup>d</sup>Includes only patients with the specified alteration, wild-type/positive for the other two markers. Unknown, sample analyzed with inconclusive result; missing, sample was not analyzed for that marker. IHC, immunohistochemistry; PI3K, phosphatidylinositol 3-kinase; PTEN, phosphatase and tensin homolog.

**SUPPLEMENTARY TABLE 2.** Summary of Adverse Events Suspected to Be Related to Study Drug

| Adverse event, <i>n</i> (%) | Squamous<br><i>n</i> = 30 |            | Non-Squamous<br><i>n</i> = 33 |            |
|-----------------------------|---------------------------|------------|-------------------------------|------------|
|                             | Grade 3/4                 | All grades | Grade 3/4                     | All grades |
| Hyperglycemia               | 7 (23.3)                  | 11 (36.7)  | 4 (12.1)                      | 10 (30.3)  |
| Pruritus                    | 1 (3.3)                   | 10 (33.3)  | 0                             | 4 (12.1)   |
| Diarrhea                    | 0                         | 9 (30.0)   | 1 (3.0)                       | 8 (24.2)   |
| Nausea                      | 0                         | 9 (30.0)   | 1 (3.0)                       | 9 (27.3)   |
| Rash                        | 1 (3.3)                   | 8 (26.7)   | 2 (6.1)                       | 7 (21.2)   |
| Fatigue                     | 2 (6.7)                   | 7 (23.3)   | 1 (3.0)                       | 4 (12.1)   |
| Decreased appetite          | 0                         | 7 (23.3)   | 0                             | 9 (27.3)   |
| Asthenia                    | 2 (6.7)                   | 5 (16.7)   | 2 (6.1)                       | 10 (30.3)  |
| Anemia                      | 1 (3.3)                   | 4 (13.3)   | 1 (3.0)                       | 2 (6.1)    |
| Abdominal pain              | 0                         | 3 (10.0)   | 1 (3.0)                       | 1 (3.0)    |
| Constipation                | 0                         | 3 (10.0)   | 0                             | 2 (6.1)    |
| Vomiting                    | 0                         | 3 (10.0)   | 0                             | 3 (9.1)    |
| Increased ALT               | 1 (3.3)                   | 3 (10.0)   | 5 (15.2)                      | 6 (18.2)   |
| Increased AST               | 1 (3.3)                   | 3 (10.0)   | 4 (12.1)                      | 6 (18.2)   |
| Anxiety                     | 1 (3.3)                   | 2 (6.7)    | 0                             | 7 (21.2)   |
| Depression                  | 0                         | 2 (6.7)    | 1 (3.0)                       | 6 (18.2)   |
| Dry skin                    | 0                         | 2 (6.7)    | 0                             | 5 (15.2)   |
| Dysgeusia                   | 0                         | 2 (6.7)    | 0                             | 4 (12.1)   |
| Stomatitis                  | 0                         | 2 (6.7)    | 0                             | 4 (12.1)   |

Adverse events were described according to MedDRA v17.0, and are listed in order of descending frequency in the squamous group 'All grades' column.

ALT, alanine aminotransferase; AST, aspartate aminotransferase; MedDRA, Medical Dictionary for Regulatory Activities.

## SUPPLEMENTARY FIGURE 1. Study Schema

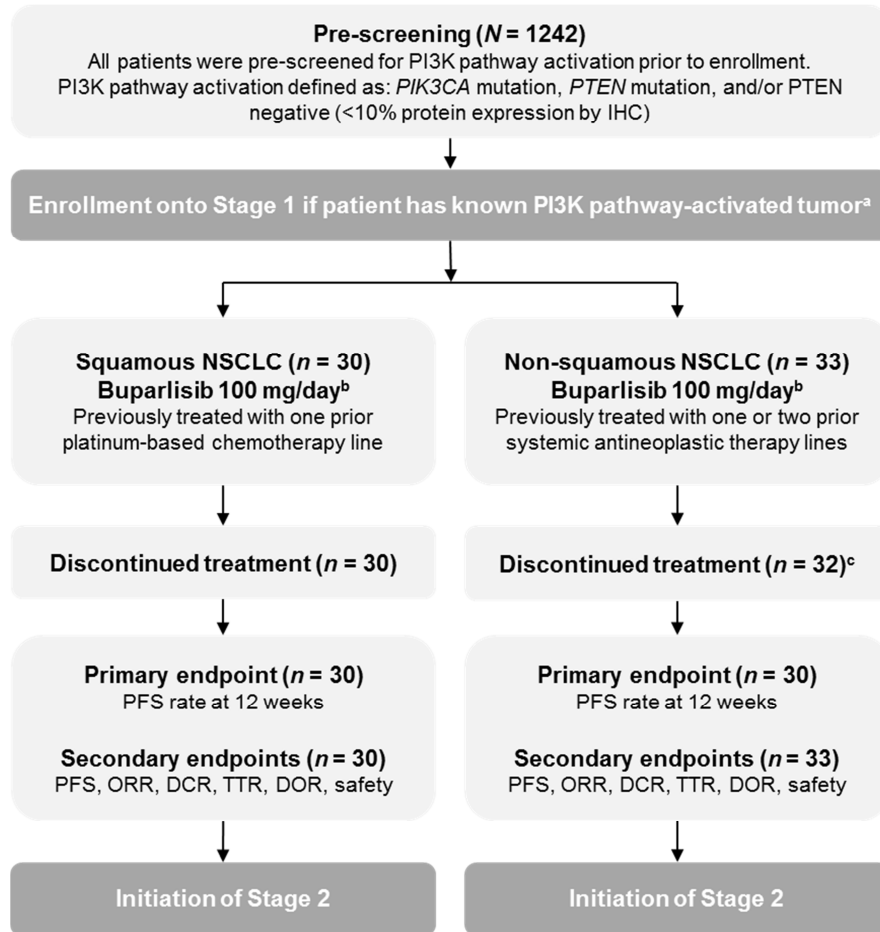

<sup>a</sup>BASALT-1 is a two-stage trial; data reported here are for Stage 1 only.

<sup>b</sup>Continuous 21-day cycles.

<sup>c</sup>One patient continued to receive treatment at the cut-off date (June 5, 2014).

DCR, disease control rate; DOR, duration of response; IHC, immunohistochemistry; NSCLC, non-small cell lung cancer; ORR, overall response rate; OS, overall survival; PFS, progression-free survival; PI3K, phosphatidylinositol 3-kinase; PTEN, phosphatase and tensin homolog; TTR, time to response.

**SUPPLEMENTARY FIGURE 2.** Kaplan–Meier Plot of Progression-Free Survival in *PIK3CA*-Mutant and *PTEN*-Altered Subpopulations

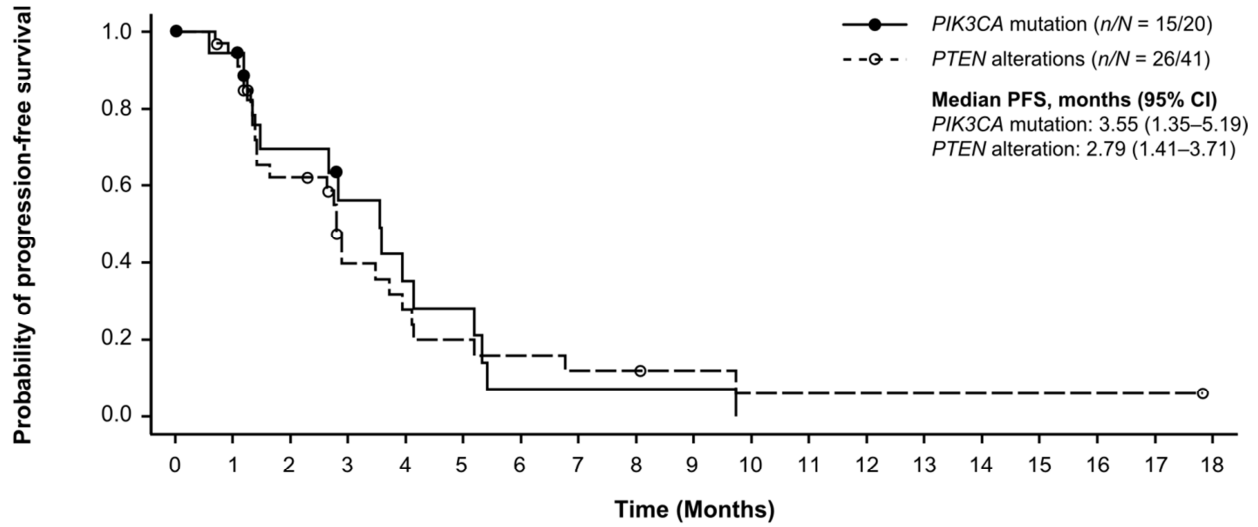

|                         | 0  | 1  | 2  | 3  | 4 | 5 | 6 | 7 | 8 | 9 | 10 | 11 | 12 | 13 | 14 | 15 | 16 | 17 | 18 |
|-------------------------|----|----|----|----|---|---|---|---|---|---|----|----|----|----|----|----|----|----|----|
| <i>PIK3CA</i> mutation  | 20 | 17 | 11 | 8  | 5 | 4 | 1 | 1 | 1 | 1 | 0  | 0  | 0  | 0  | 0  | 0  | 0  | 0  | 0  |
| <i>PTEN</i> alterations | 41 | 31 | 19 | 10 | 7 | 5 | 4 | 3 | 3 | 2 | 1  | 1  | 1  | 1  | 1  | 1  | 1  | 1  | 0  |

Censoring times are shown as filled or open circles.

CI, confidence interval; OS, overall survival; PFS, progression-free survival.

**SUPPLEMENTARY FIGURE 3.** Alteration Landscape In Patients Analyzed by Next-Generation Sequencing, and Potential Role of Alternative Pathways on Progression-Free Survival

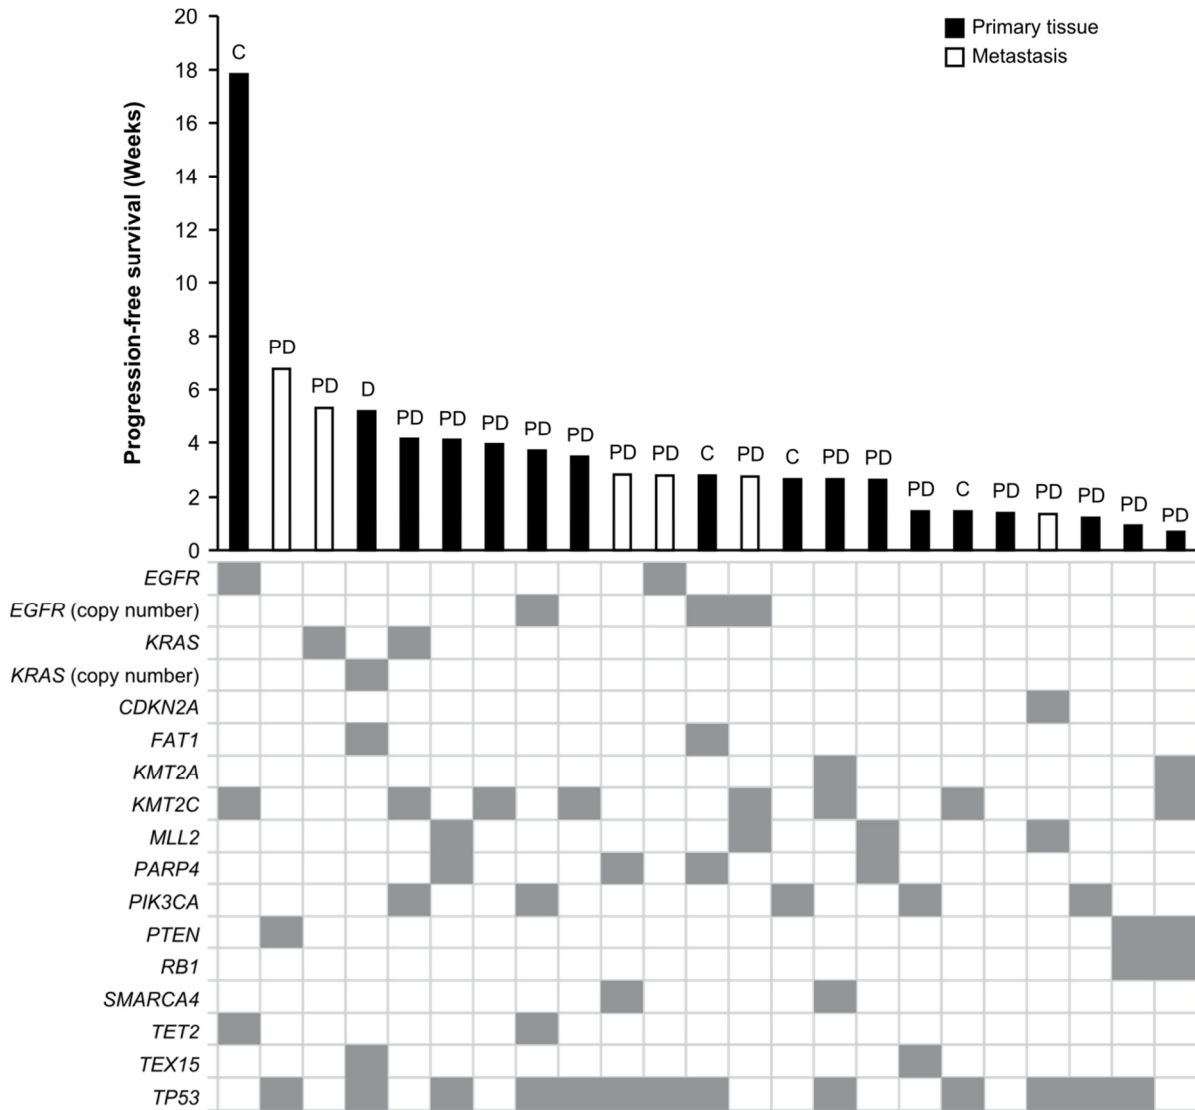

Graph shows progression-free survival of the 23 patients analyzed by next-generation sequencing. Each patient is labeled according to event type, and bars are shaded according to the source of archival tissue. Genes with at least two known/likely alterations within the cohort are listed below the graph – shading indicates the presence of a mutation (or change in copy number, where specified for *EGFR* and *KRAS*).

C, censored; D, death; PD, progressive disease.
